# Supplementary material
Source: PubMed Central journal article supplement (PMC2375459)
Supplement: tjp0585-0241_SD3.pdf [file tjp0585-0241_SD3.pdf]

Supplementary for Data De Boer et al The temporal responses of protein synthesis etc

| <i>Primer</i>     | <i>Sense (5'-3')</i>     | <i>Anti-sense(5'-3')</i> |
|-------------------|--------------------------|--------------------------|
| MAFBx             | TCCTGGAAGGGCACTGAC       | CCATATTCCCAGCTCTCCAG     |
| MuRF-1            | CAAGGAGCACGAAGATGAG      | CCACCAGCATGGAGATACAG     |
| TPP-II            | ATGCTGAAAAGGAACGAATGAA   | GGGCACAACCTTTCCTACAA     |
| Myostatin         | CTACAACGGAAACAATCATTACCA | GTTTCAGAGATCGGATTCCAGTAT |
| MHC1 $\beta$      | ACAAGCTGCAGCTAAAGGTC     | TCAAGATGTGGCAAAGCTAC     |
| MHCIIA            | AGGCTTCAAGATTTGGTAGA     | TTCCTTTGCAACAGGGTAGA     |
| MHCIIIX           | AAGAGCAGGGAGGTTACACAC    | TTATCTCCAAAAGTCATAAGTACA |
| Coll( $\alpha$ )1 | GTGCTAAAGGTGCCAATGGT     | CTCCTCGCTTTCCTTCCTCT     |

Table 1. RT-PCR primer sequences.

Supplementary Data Figure S1 (Western analysis of phosphoproteins)

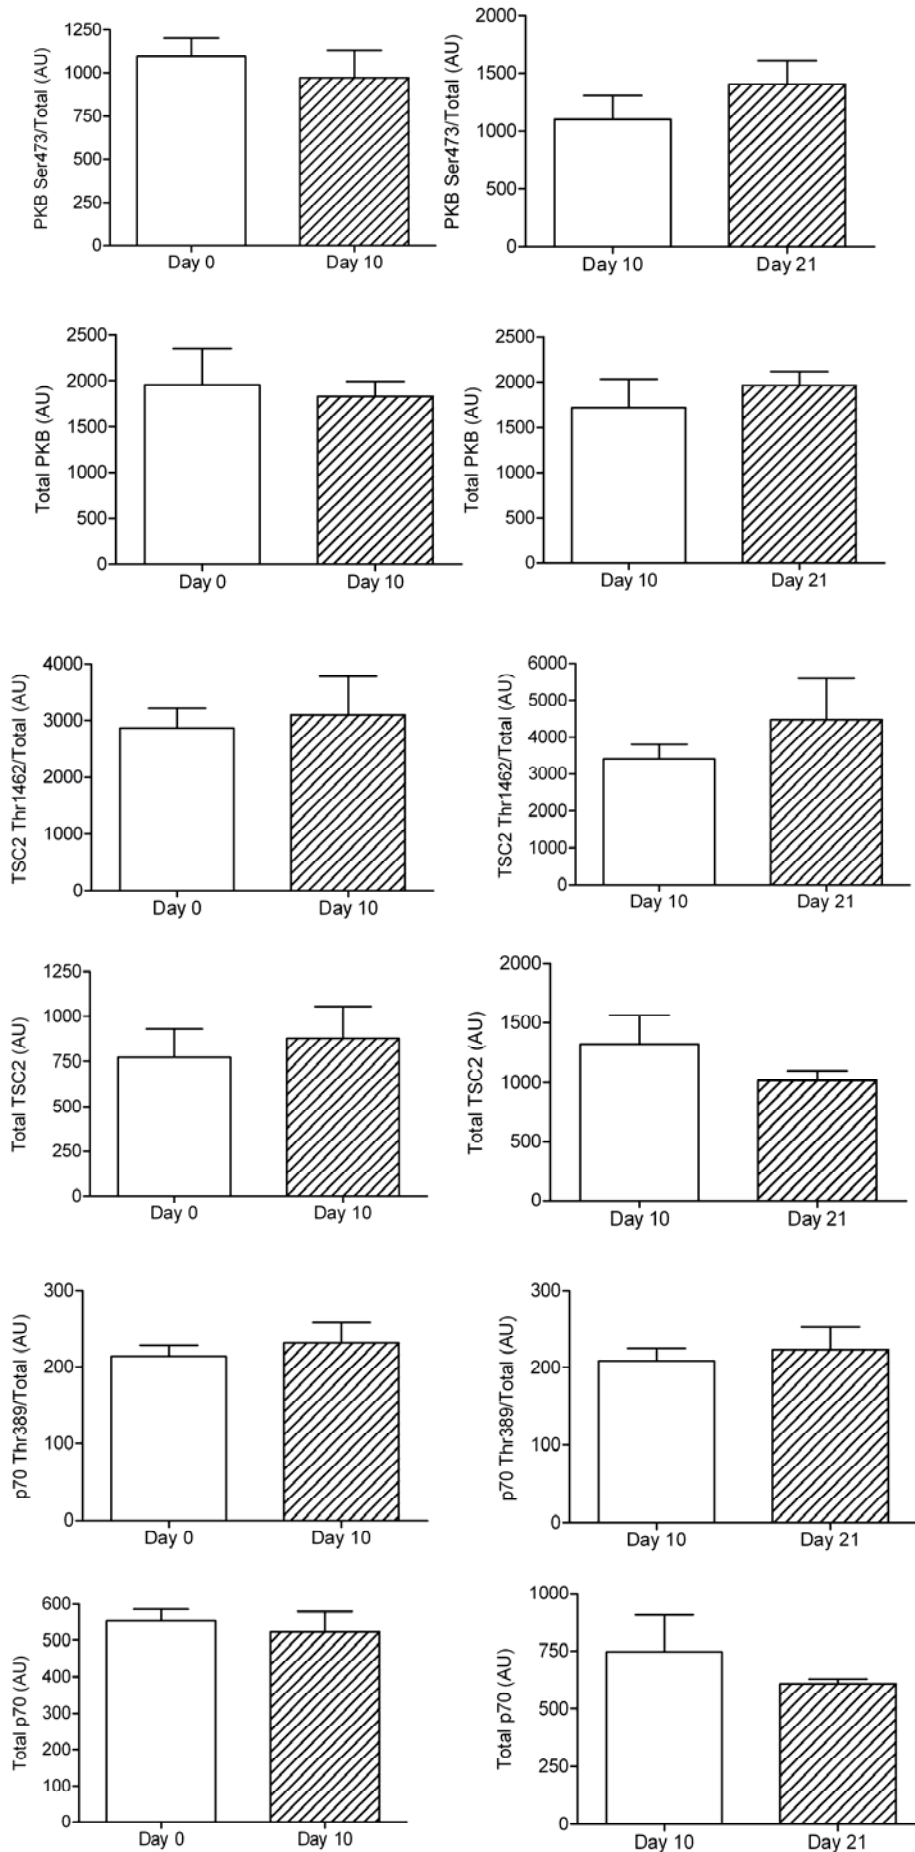

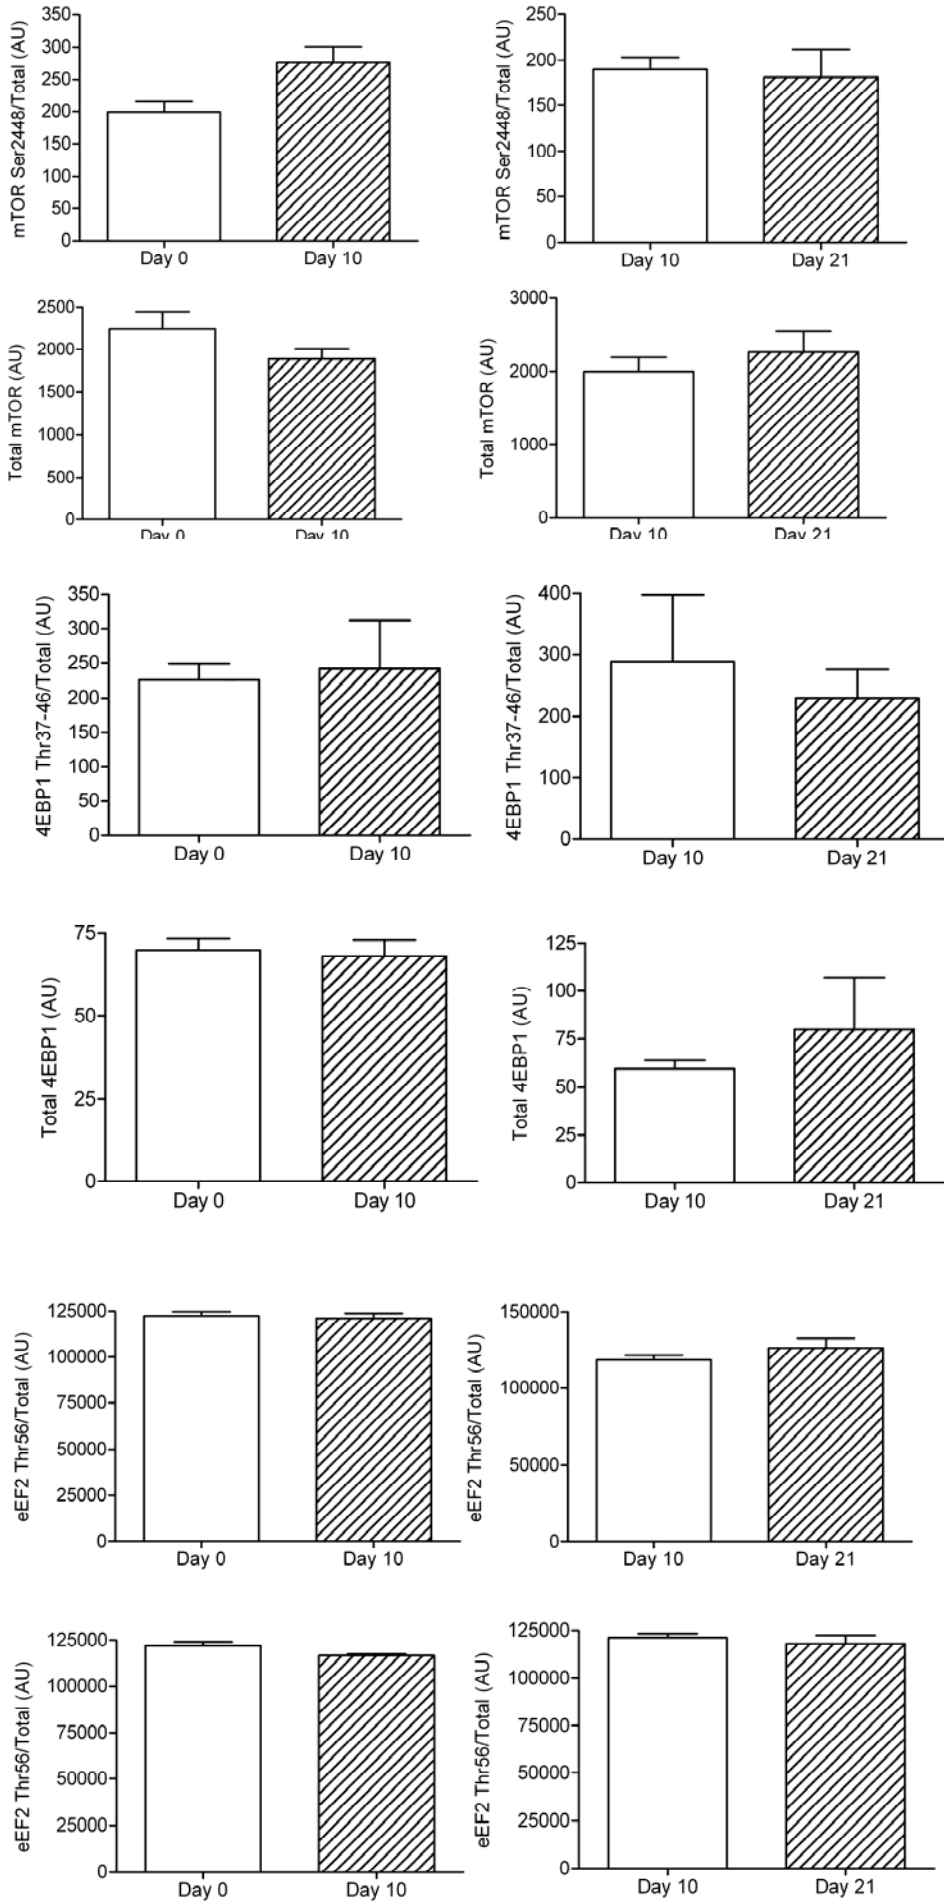

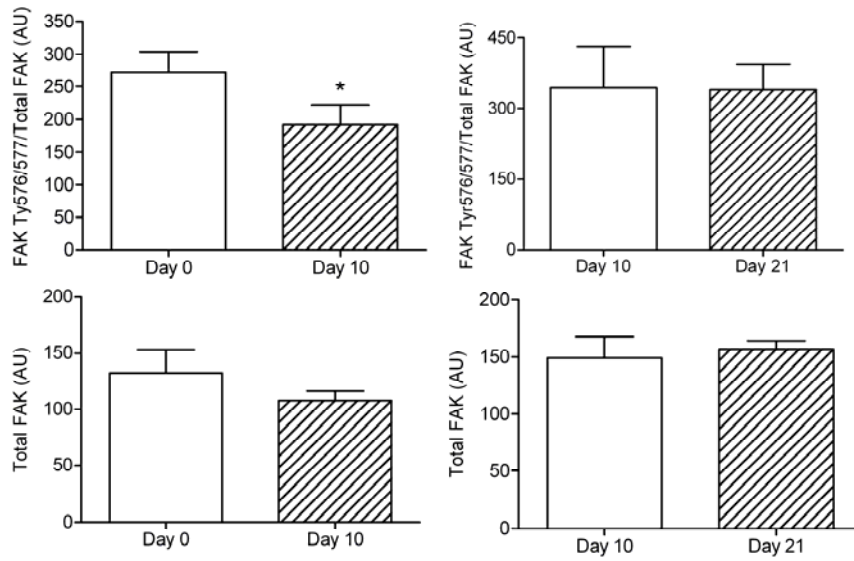

Supplementary Data Figure 1. Immunoblots for protein targets quantified to show both total and phosphorylated relative to total. Values are means and standard errors.

\* =  $P < 0.05$ .

Supplementary Data Figure S2 (mRNA expression)

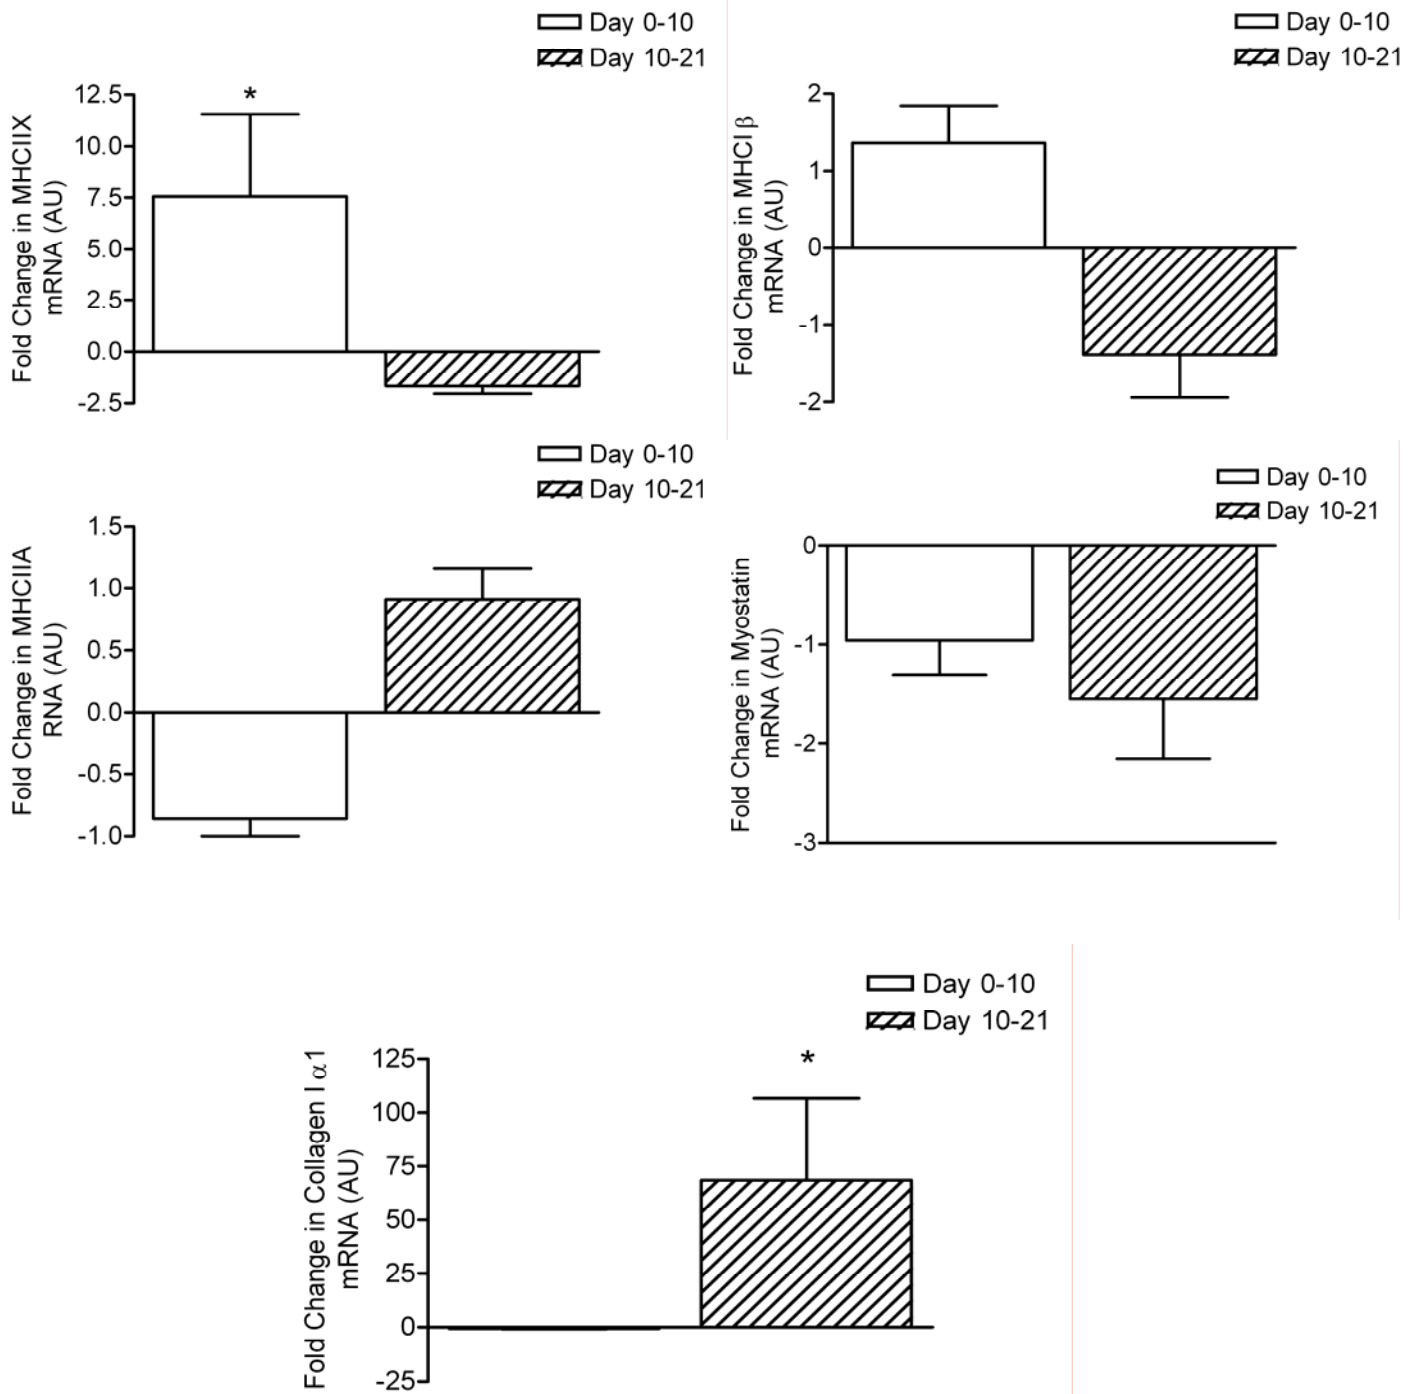

Supplementary Data Figure S 2. mRNA expression for gene targets. Values are means and standard errors. \* = P<0.05.
